# Effects of ageing on spermatozoal chromatin and its sensitivity to *in vivo* and *in vitro* oxidative challenge in the Brown Norway rat

Ekaterina V.Zubkova<sup>1</sup> and Bernard Robaire<sup>1,2,3</sup>

<sup>1</sup>Department of Pharmacology and Therapeutics and <sup>2</sup>Department of Obstetrics and Gynecology, McGill University, Montreal, Quebec, Canada

<sup>3</sup>To whom correspondence should be addressed at: Department of Pharmacology and Therapeutics, 3655 Promenade Sir William Osler, Room 104, Montréal, QC, Canada H3G1Y6. E-mail: bernard.robair@mcgill.ca

**BACKGROUND:** The goals of our study were to examine chromatin packaging and integrity in spermatozoa taken from the caput and cauda epididymides of young (4-month-old) and old (21-month-old) Brown Norway rats and to assess whether spermatozoal sensitivity to oxidative treatments is altered with age. **METHODS:** Oxidative treatments consisted of (i) *in vivo* oxidative challenge by systemic administration of the glutathione-depleting drug L-buthionine-[S,R]-sulphoximine (BSO) and (ii) *in vitro* oxidative challenge by incubating collected spermatozoa with hydrogen peroxide (H<sub>2</sub>O<sub>2</sub>). Chromatin parameters assessed included quantification of thiols, nuclear chromomycin A3 (CMA3) penetration, DNA breaks by TdT (terminal deoxynucleotidyl transferase)-mediated dUDP nick-end labelling (TUNEL) and ease of DNA dissociation by acridine orange (AO) staining. **RESULTS:** In spermatozoa from older rats, we found decreases in thiols, CMA3 penetration and the percentage of cells that undergo DNA dissociation. Administration of BSO had oxidizing effects on the thiol groups. It also decreased CMA3 penetration and DNA dissociation and increased TUNEL staining. Furthermore, BSO treatment sensitized cauda epididymidis spermatozoa, from older animals, to H<sub>2</sub>O<sub>2</sub>. **CONCLUSIONS:** Overall, we show that spermatozoa from older rats have altered chromatin packaging and integrity and that spermatozoa from the cauda epididymidis are more responsive to combined *in vivo* and *in vitro* oxidative challenge than spermatozoa from young rats.

**Key words:** DNA damage/sperm biochemistry/sperm chromosomes/sperm quality

## Introduction

Ageing in mammals is associated with a widespread decline in physiological function. Although it had been generally accepted that male fertility is immune to the effects of age, several recent studies have established that many aspects of male fertility are affected by ageing. Specifically, semen volume and spermatozoal motility have been found to decrease in ageing men, whereas the proportion of abnormal spermatozoa increases (Plas *et al.*, 2000; Kidd *et al.*, 2001). Increasing paternal age is also associated with numerical and structural chromosomal abnormalities in spermatozoa (Sartorelli *et al.*, 2001; Kuhnert and Nieschlag, 2004). Furthermore, epidemiological evidence indicates that children born to older fathers have a greater incidence of genetic diseases; these diseases cover a wide spectrum that remains poorly defined, but some of the stronger correlations include schizophrenia, achondroplasia and Apert's syndrome (Kuhnert and Nieschlag, 2004; Baird *et al.*, 2005).

The mechanisms that underlie the increases in genetic disease with age remain unclear, but they are a symptom of the

ageing male reproductive system. Previous reports have found structural changes in the seminiferous tubules of the testes with age (Levy *et al.*, 1999; Morales *et al.*, 2004), and the high number of divisions that spermatogonia undergo over the course of a man's lifetime may also result in an accumulation of DNA mutations (Hurst and Ellegren, 1998; Crow, 1999).

Protamination of spermatozoa during spermiogenesis is more likely to play a major role in regulating its final DNA quality. During spermiogenesis, histones become hyperacetylated and are briefly replaced by transition proteins, which are then replaced by protamines (Wouters-Tyrou *et al.*, 1998; Dadoune, 2003). Protamines are rich in free thiols, which can form disulphide bonds with other protamines (Balhorn, 1982), thus stabilizing the already compact spermatozoal chromatin. When spermatozoa begin their passage through the epididymis, the thiols have not yet become oxidized; this occurs during the journey in the epididymal lumen, where over the course of several days, the balance becomes shifted in favour of disulphides (Calvin and Bedford, 1971; Shalgi *et al.*, 1989). Defective protamination has been shown to be associated

with poor spermatozoa quality and to be correlated with male-factor infertility (Bianchi *et al.*, 1993; Nasr-Esfahani *et al.*, 2004; Aoki *et al.*, 2005).

The balance between oxidation and reduction has been established as a key component in maintaining the integrity of spermatozoa. Although some oxidation is critical to ensure disulphide bond formation within the nucleus of spermatozoa, excessive oxidation is a well-established hazard to spermatozoa, resulting in peroxidation of membrane lipids and in DNA damage (de Lamirande and Gagnon, 1995; Aitken and Krausz, 2001; Sikka, 2001). Disproportionate spermatozoa oxidation can occur from increased *in vivo* reactive oxygen species (ROS) production, such as during inflammation of the male reproductive tract, or as a result of certain medications, exposure to chemicals and smoking (Tirmenstien and Nelson, 1990; Bagchi *et al.*, 1993; Ochsendorf, 1999; Sikka, 2001; Alberg, 2002; Bruno and Traber, 2005; Gurbay *et al.*, 2005). Ageing is another example of increased systemic oxidant load. The results of several studies clearly establish that ageing is associated with increased production of ROS, primarily from the mitochondria electron transport chain (Harman, 1972; Bokov *et al.*, 2004; Balaban *et al.*, 2005). There is also evidence to suggest that levels of antioxidants, such as glutathione, are altered with age and that ROS removal may become impaired (Hazelton and Lang, 1985; Rebrin *et al.*, 2004; Zubkova and Robaire, 2004; Morrison *et al.*, 2005). Other than the *in vivo* sources of ROS, spermatozoa can also become damaged during and after ejaculation; ROS and ROS-producing bacteria from accessory gland infections can mix with the seminal fluids, or spermatozoa can become exposed to ROS in the course of laboratory manipulation during IVF (Alvarez and Storey, 1992; de Jager *et al.*, 1996; Hughes *et al.*, 1998; Comhaire *et al.*, 1999; Roca *et al.*, 2005).

The objective of this study was to assess the packaging of chromatin in spermatozoa, and to compare the susceptibility to oxidative stress of spermatozoa from the caput and cauda epididymides of young and old rats. To exacerbate the effects of ageing, we oxidatively challenged the rats by depleting the main cellular antioxidant, glutathione, using the drug L-buthionine-[S,R]-sulphoximine (BSO), which is an inhibitor of the rate-limiting enzyme of glutathione synthesis,  $\gamma$ -glutamylcysteine synthetase (Griffith and Meister, 1979; Martensson *et al.*, 1991). We have previously shown that systemic BSO administration effectively decreases glutathione in male reproductive tissues (Zubkova and Robaire, 2004).

By treating the rats with BSO for 7 days, spermatozoa became exposed to the drug during the following two phases of their maturation: spermatozoa collected from the caput epididymidis were exposed from approximately step 16 of spermiogenesis and until their entry into the caput epididymidis (Clermont, 1972), whereas spermatozoa collected from the cauda epididymidis were exposed during their transport throughout the organ (Robaire and Hermo, 1988). This allowed the determination of the differential effects of BSO on spermatozoa at these two stages in their development.

We evaluated the sensitivity of spermatozoa to external oxidant exposure in addition to their susceptibility to systemic oxidative challenge. For this, we used hydrogen peroxide

(H<sub>2</sub>O<sub>2</sub>), as this compound reacts with transition metal ions to rapidly form the highly oxidizing hydroxyl radical (OH<sup>•</sup>) (Halliwell and Gutteridge, 2002). This experimental design also allows us to determine whether *in vivo* oxidizing challenge increases the sensitivity of spermatozoa to *in vitro* oxidative stress and whether this sensitization effect is amplified by ageing.

## Materials and methods

### Chemicals

All chemicals were purchased from Sigma-Aldrich (St. Louis, MO, USA), except for BSO (Toronto Research Chemicals Inc., North York, ON, Canada), monobromobimane (mBBBr), sold as Thiolyte® MB, (Calbiochem, San Diego, CA, USA) and the Apo-Direct™ kit (Pharmingen, San Diego, CA, USA).

### Animals

Male Brown Norway rats were obtained through the National Institutes on Aging (Bethesda, MD, USA) from Harlan Sprague Dawley, Inc. (Indianapolis, IN, USA). Rats in the young group were 4 months old and those in the aged group were 21 months old. The animals were housed in a 14 h light : 10 h dark cycle; food and water were provided *ad libitum*. All animal studies followed the principles and procedures outlined in 'A Guide to the Care and Use of Experimental Animals' prepared by the Canadian Council on Animal Care (McGill protocol no. 4687).

### BSO administration

The young and old rats were assigned randomly to either treated or control groups. Those in the treated groups received subcutaneous injections of 2 mmol/kg BSO dissolved in saline at 12 h intervals, for 7 days. Those in the control groups received injections of volume-adjusted saline. Animals were killed by CO<sub>2</sub> asphyxiation 2 h after their last injection.

### Collection of spermatozoa

Spermatozoa from the caput and cauda epididymides of non-regressed testes were collected into a motility buffer (Slott *et al.*, 1991) to increase yield. They were then washed once with hypotonic buffer (0.45% NaCl) to lyse any contaminating cells and twice with phosphate-buffered saline (PBS) (1 mM KH<sub>2</sub>PO<sub>4</sub>, 10 mM Na<sub>2</sub>HPO<sub>4</sub>, 137 mM NaCl, 2.7 mM KCl, pH 7.0). The final suspension was divided into 1 ml aliquots of approximately 5–10 × 10<sup>6</sup> spermatozoa that were stored at –80°C.

### mBBBr thiol labelling

Thiol labelling was done to quantify the total thiol, free thiol and disulphide levels in the nuclei of spermatozoa. On the day of the assay, spermatozoa were thawed and both the control and BSO-treated samples were further separated into two groups of about 5–10 × 10<sup>6</sup> cells each; one group was incubated in PBS and the other in 5 mM H<sub>2</sub>O<sub>2</sub> for 1 h at 25°C. The spermatozoa were then washed twice in PBS and sonicated on ice to separate the heads from the tails. Labelling with mBBBr and analysis by flow cytometry were performed as described by Zubkova *et al.* (2005).

### Chromomycin A3 staining

The CMA3 penetrability test was used to assess the extent of spermatozoal nuclear protamination and as an indicator of chromatin condensation. On the day of the assay, spermatozoa were thawed and both the control and BSO-treated samples were further separated into two

groups of about  $5\text{--}10 \times 10^6$  cells each; one group was incubated in PBS and the other in 5 mM  $\text{H}_2\text{O}_2$  for 1 h at 25°C. The spermatozoa were then washed twice in PBS and sonicated on ice to separate the heads from the tails. CMA3 labelling and analysis by flow cytometry were performed as described previously by Zubkova *et al.* (2005).

#### TUNEL assay

The TdT (terminal deoxynucleotidyl transferase)-mediated dUDP nick-end labelling (TUNEL) assay was used to quantify the extent of 3'-hydroxyl (OH) breaks in single- and double stranded DNA. On the day of the assay, spermatozoa were thawed and both the control and BSO-treated samples were further separated into two groups of about  $5\text{--}10 \times 10^6$  cells each; one group was incubated in PBS and the other in 5 mM  $\text{H}_2\text{O}_2$  for 1 h at 25°C. The cells were then washed in PBS twice, followed by sonication on ice. DNA strand breaks were analysed using the Apo-Direct™ kit with some modifications. Briefly, spermatozoa were resuspended in 70% ice-cold ethanol to a concentration of about  $1\text{--}2 \times 10^6$  cells/ml and stored at  $-20^\circ\text{C}$  for 3 days. They were then centrifuged for 5 min at  $5000 \times g$ , washed twice with 1 ml wash buffer each time and incubated in 100  $\mu\text{l}$  staining solution [containing the reaction buffer, terminal deoxytransferase (TdT) enzyme, fluorescein isothiocyanate (FITC)-tagged deoxyuridine triphosphate nucleotides and distilled water, as per kit instructions] in the dark at 37°C for 1 h. The reaction was terminated by the addition of 1 ml Rinse buffer, after which the spermatozoa were centrifuged for 5 min at  $5000 \times g$  and washed one more time with Rinse buffer. They were then resuspended in 500  $\mu\text{l}$  propidium iodide (PI)/RNase and stored in the dark overnight at 4°C. To verify the linearity of the reaction, we tested a set of positive controls, which were produced by pretreating the cells with DNase I (100 U/ $\mu\text{l}$ ) for 5–15 min at 25°C. A negative control, consisting of cells stained with the staining solution lacking the terminal deoxytransferase enzyme, was included as a negative control with every group in the study.

Intensity of FITC staining was analysed spectrophotometrically using the BD FACSAria Cell Sorting System (BD Bioscience, San Jose, CA, USA) fitted with a 488 nm laser. For FITC detection, light emission was filtered through a 502 nm long pass filter, as well as a 530/30 nm band pass filter, whereas PI was detected using a 556 nm long pass filter, followed by a 575/26 nm band pass filter. Fluorescence was quantified by the BD FACSDiva software (BD Bioscience). A total of 10 000 events was analysed for every sample.

#### Acridine orange assay

The acridine orange (AO) assay was used to measure DNA denaturability in mature spermatozoa, which is an indicator of overall DNA quality (Evenson *et al.*, 2002). On the day of the assay, spermatozoa were thawed and both the control and BSO-treated samples were further separated into two groups of about  $5\text{--}10 \times 10^6$  cells each: one group was incubated in PBS and the other in 1 mM  $\text{H}_2\text{O}_2$  for 1 h at 25°C. The cells were then washed in PBS twice, followed by sonication on ice.

The AO assay was performed based on the method described by Evenson *et al.* (1985). Briefly, a 200  $\mu\text{l}$  aliquot of spermatozoa was placed into a 12 mm  $\times$  75 mm tube and was mixed with 400  $\mu\text{l}$  of DNA denaturation buffer (0.1% Triton X-100, 0.15 M NaCl, 0.08 N HCl, pH 1.4). After 30 s, 1.2 ml of AO staining buffer (200 mM  $\text{Na}_2\text{HPO}_4$ , 0.1 M citric acid buffer, pH 6.0, 1 mM EDTA, 150 mM NaCl and 6  $\mu\text{g}/\text{ml}$  AO) was added and the reaction was allowed to proceed for 3 min, after which nuclear fluorescence was analysed spectrophotometrically using a BD FACScan Analyzer System (BD Bioscience) fitted with a 488 nm argon-ion laser. Light emission was filtered using a 502 nm long pass filter, followed by a 530/30 nm band pass filter (for detecting green fluorescence), and also using a 670 nm

long pass filter, followed by a 660/20 nm band pass filter (for detecting red fluorescence). The resulting fluorescence was quantified by the BD CellQuest Pro software (BD Bioscience). A total of 10 000 events was analysed for each sample.

The extent of DNA denaturation was quantified by the calculated parameter DNA fragmentation index (DFI), using the following formula: red fluorescence/(red + green fluorescence)  $\times$  1024. The percentage of cells with abnormal DFI was defined as percentage DFI.

#### Statistical analysis

Statistical analysis was performed using Systat v10.2 (Systat Software Inc., Richmond, CA, USA) and consisted of two-way ANOVA (to assess age and epididymal segment-specific changes), three-way ANOVA (to assess whether the effect of BSO treatment was dependent on age and/or segment) and four-way ANOVA (to assess whether the effect of  $\text{H}_2\text{O}_2$  was dependent on age and/or segment and/or BSO). Results were considered significant at  $P < 0.05$  ( $n = 8$ ) and the figures show mean  $\pm$  SEM values.

#### Results

A full statistical summary is provided in Table I.

#### mBBr thiol labelling

Consistent with previous observations (Calvin and Bedford, 1971; Evenson *et al.*, 1989; Conrad *et al.*, 2005), we noted a significant primary effect of segment on free thiols and disulphides (Figure 1B and C). Interestingly, age also had a significant effect, where all of the thiol parameters were lower in spermatozoa heads of older rats. Additionally, all thiol parameters had a significant interaction between age and segment, the decrease being consistently greater in the caput epididymidis region. Free thiols decreased by about 13% in spermatozoa from the caput epididymidis and did not change in spermatozoa from the cauda. Furthermore, disulphides decreased by 45 and 28% in spermatozoa from the caput and cauda epididymidis region, respectively.

Exposure to BSO did not change the overall thiol quantities, but it shifted the balance towards the disulphides. However, this effect was dependent on segment (segment  $\times$  BSO), as the changes were observed primarily in spermatozoa from the caput epididymidis.

Incubation with  $\text{H}_2\text{O}_2$  had a dramatic effect on all spermatozoa, decreasing total thiol levels and converting most of the free thiols to disulphides. The  $\text{H}_2\text{O}_2$ -induced changes in total thiols and free thiols were dependent on age (age  $\times$   $\text{H}_2\text{O}_2$ ), with the effects being greater on spermatozoa from younger animals. Clearly, the shift was more pronounced in caput epididymal spermatozoa than in those from the cauda epididymidis, at which point most of the thiols were already in the form of disulphides. The treatment with  $\text{H}_2\text{O}_2$  interacted with BSO (BSO  $\times$   $\text{H}_2\text{O}_2$ ), where the BSO treatment pre-shifted the thiol balance, thus diminishing the  $\text{H}_2\text{O}_2$ -induced change.

Analysis by flow cytometry is a very powerful technique, because it determines the average fluorochrome intensity and allows for quantification of fluorescence in each individual spermatozoal head. Therefore, by analysing the raw flow cytometric data for mBBr, we noted that the spermatozoa from older animals composed not one, but two distinct populations

**Table 1.** Complete summary of statistical analysis by ANOVA

|                                                     | Total thiols | Free thiols | Disulphides | CMA3   | TUNEL  | DFI    | Percentage DFI |
|-----------------------------------------------------|--------------|-------------|-------------|--------|--------|--------|----------------|
| Two-way ANOVA                                       |              |             |             |        |        |        |                |
| Age                                                 | <0.001       | <0.001      | <0.001      | <0.001 | 0.0016 | 0.014  | <0.003         |
| Segment                                             | 0.648        | <0.001      | <0.001      | <0.001 | 0.029  | <0.001 | <0.001         |
| Age × segment                                       | 0.007        | <0.001      | <0.001      | 0.275  | 0.071  | 0.263  | 0.015          |
| Three-way ANOVA                                     |              |             |             |        |        |        |                |
| BSO                                                 | 0.163        | <0.001      | <0.001      | 0.044  | <0.001 | <0.001 | <0.001         |
| Age × BSO                                           | 0.472        | 0.397       | 0.654       | 0.157  | 0.696  | 0.011  | 0.007          |
| Segment × BSO                                       | 0.080        | <0.001      | <0.001      | 0.025  | 0.029  | <0.001 | <0.001         |
| Age × segment × BSO                                 | 0.156        | 0.255       | 0.054       | 0.680  | 0.084  | 0.764  | 0.073          |
| Four-way ANOVA                                      |              |             |             |        |        |        |                |
| H <sub>2</sub> O <sub>2</sub>                       | <0.001       | <0.001      | <0.001      | <0.001 | 0.551  | <0.001 | <0.001         |
| Age × H <sub>2</sub> O <sub>2</sub>                 | 0.002        | <0.001      | 0.722       | <0.001 | <0.001 | 0.426  | 0.059          |
| Segment × H <sub>2</sub> O <sub>2</sub>             | 0.128        | <0.001      | <0.001      | <0.001 | <0.001 | <0.001 | 0.580          |
| BSO × H <sub>2</sub> O <sub>2</sub>                 | 0.954        | <0.001      | <0.001      | 0.097  | 0.164  | 0.006  | <0.001         |
| Age × BSO × H <sub>2</sub> O <sub>2</sub>           | 0.143        | 0.370       | 0.202       | 0.013  | 0.401  | 0.063  | 0.090          |
| Age × segment × H <sub>2</sub> O <sub>2</sub>       | 0.485        | <0.001      | 0.012       | 0.009  | 0.441  | 0.260  | 0.893          |
| BSO × segment × H <sub>2</sub> O <sub>2</sub>       | 0.273        | <0.001      | <0.001      | 0.968  | 0.437  | 0.016  | 0.002          |
| Age × segment × BSO × H <sub>2</sub> O <sub>2</sub> | 0.656        | 0.383       | 0.310       | <0.001 | 0.086  | 0.833  | 0.902          |

BSO, L-buthionine-[S,R]-sulphoximine; DFI, DNA fragmentation index.

Columns 2–8 summarize statistical analysis for the mBBR assay (consisting of total thiols, free thiols and disulphides), the CMA3 assay, the TUNEL assay and the acridine orange assay (consisting of DFI and percentage DFI), respectively.

(Figure 2). This finding was highly consistent among different samples, and clearly showed that about 5–10% of cells had considerably lower thiol staining. In fact, the observed decreases in the mean values of total, free thiols and disulphides in spermatozoa from older rats can be entirely attributed to this second population.

### Chromomycin A3 staining

Spermatozoa from the caput epididymidis had more CMA3 staining than those from the cauda region (Figure 3). An age effect was also observed, where staining was decreased by over 10% in spermatozoa from both the caput and cauda epididymidis from older animals. BSO treatment significantly reduced CMA3 staining in spermatozoa; this decrease was segment-dependent (BSO × segment), where it was observed primarily in spermatozoa from the caput epididymidis.

Exposure to H<sub>2</sub>O<sub>2</sub> had a dramatic effect. There was also an interaction with segment (H<sub>2</sub>O<sub>2</sub> × segment), manifested by a 44–53% decrease in staining in all caput epididymidis spermatozoa and a 23–37% decrease in cauda epididymidis spermatozoa (except for spermatozoa extracted from BSO-treated older animals). The age × segment × BSO × H<sub>2</sub>O<sub>2</sub> interaction was highly significant, drawing attention to the observation that in cauda epididymidis spermatozoa from old, BSO-treated animals, CMA3 fluorescence did not change after exposure to H<sub>2</sub>O<sub>2</sub>. This was unlike what was seen in spermatozoa from the other groups, in which H<sub>2</sub>O<sub>2</sub> exposure consistently resulted in decreased CMA3 staining.

### TUNEL assay

Relative FITC intensity was low in most of the spermatozoa samples, suggesting that rat spermatozoa have relatively few 3'OH breaks in their DNA (Figure 4). There was a significant difference in staining depending on age and also on the epididymal segment, where cauda spermatozoa from old animals showed more staining than those from the caput epididymidis.

The interaction between age and segment, however, was not significant.

Administration of BSO resulted in increased average FITC staining in all spermatozoa samples. The increase was also segment-dependent (segment × BSO), with dramatically higher staining observed in cauda spermatozoa.

Exposure to H<sub>2</sub>O<sub>2</sub> did not have a significant primary effect, which is probably due to the variability in mean FITC fluorescence within each group. However, the interaction between age × H<sub>2</sub>O<sub>2</sub> and segment × H<sub>2</sub>O<sub>2</sub> were highly significant. Spermatozoa from the caput epididymidis of young rats were most responsive to H<sub>2</sub>O<sub>2</sub>, whereas staining in caput epididymidis spermatozoa from old rats remained unchanged. Furthermore, we observed that the staining in BSO-treated spermatozoa from the cauda epididymides of old rats decreased to extremely low levels. This response was strikingly different from that observed for other spermatozoa samples, in which staining remained the same or increased.

### AO assay

The DFI and DFI percentage parameters depended on both the age of the rat and the epididymal segment (Figure 5). Overall, denaturation parameters were greater in spermatozoa from the caput epididymidis than from the cauda and greater in spermatozoa from young than from old rats. However, although DFI was only slightly higher in spermatozoa from young animals, the DFI percentage was about double the value observed in old rats, indicating that although the extent of DNA denaturation was not vastly altered, the number of cells that responded to the denaturing treatment was about twice as great in the young rat as in the old. This is highlighted by the fact that the age segment interaction was significant only for DFI percentage.

Administration of BSO had a significant primary effect, which was also dependent on age (age × BSO) and segment (segment × BSO). It resulted in a decreased DFI percentage in both caput and cauda spermatozoa. The DFI also decreased, but only in spermatozoa taken from the caput epididymidis.

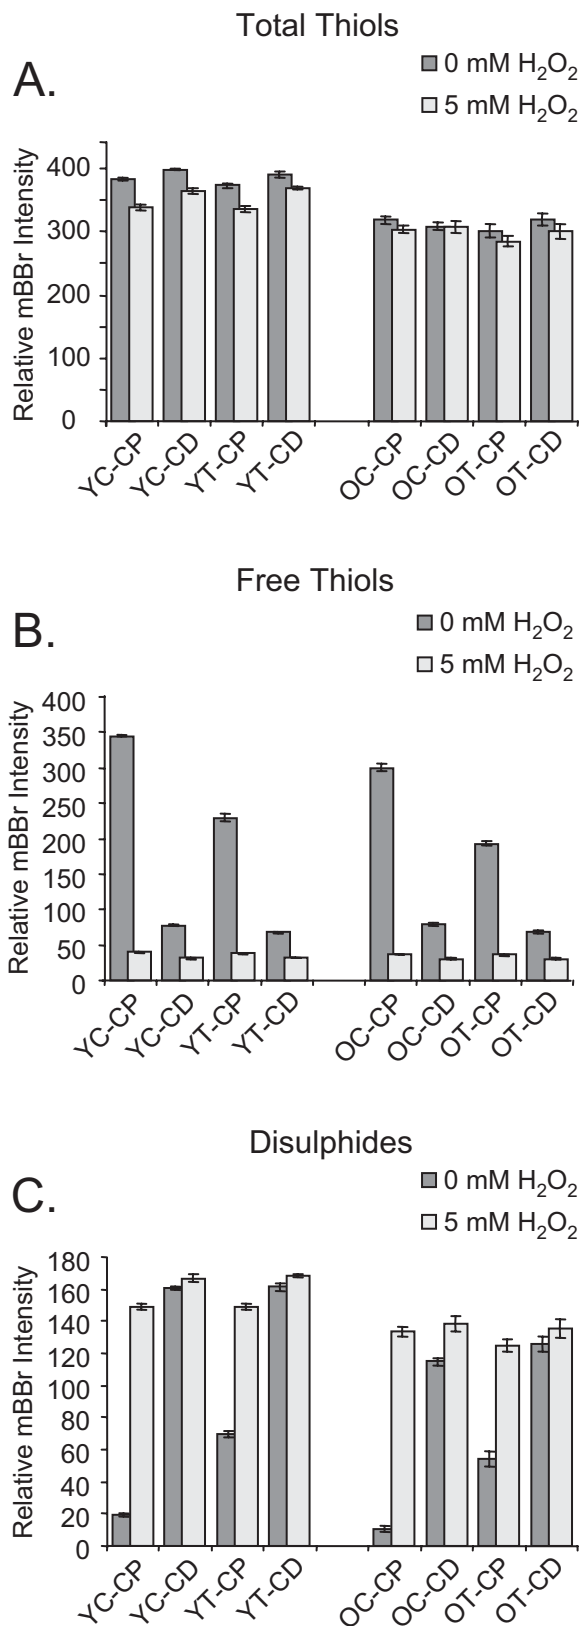

**Figure 1.** Quantification of total thiols (A), free thiols (B) and disulphides (C) in spermatozoal heads by monobromobimane (mBBR) staining. Data are mean  $\pm$  SEM,  $n = 8$ . Statistical analysis for these figures is provided in Table I. YC, young control rats; YT, young rats treated with BSO; OC, old control rats; OT, old rats treated with BSO; CP, spermatozoa extracted from the caput epididymidis; CD, spermatozoa extracted from the cauda epididymidis.

After incubation with H<sub>2</sub>O<sub>2</sub>, spermatozoa became noticeably damaged and their susceptibility to denaturation increased, as was evident from increased DFI and DFI percentage values. Both of these parameters showed a significant interaction between BSO and H<sub>2</sub>O<sub>2</sub>; the former drug decreased denaturation, whereas the latter overcame this effect and increased it. Finally, the BSO  $\times$  segment  $\times$  H<sub>2</sub>O<sub>2</sub> interaction was also significant, where caput spermatozoa were most affected by the combined treatments.

## Discussion

### *Differences between spermatozoa from the caput and cauda epididymidis*

Our first objective was to examine the effect of epididymal segment on chromatin of spermatozoa. Spermatozoa from the caput and cauda epididymidis differed, to a greater or lesser extent, in all measured parameters. Although the changes in thiol oxidation status in spermatozoal heads during epididymal passage have been reported previously (Calvin and Bedford, 1971; Evenson *et al.*, 1989; Conrad *et al.*, 2005), the other parameters have been less studied.

The decrease in CMA3 staining observed in spermatozoa from the cauda epididymis was most surprising. This finding is apparently inconsistent with the principle of the assay, which states that CMA3 competes with protamines for access to chromatin and that CMA3 binding is inversely proportional to the level of protamine deposition on the chromatin (Bianchi *et al.*, 1993; Bizzaro *et al.*, 1998). By this definition, CMA3 binding in caput and cauda epididymal spermatozoa should be identical, as protamine levels are not being altered at this stage of spermatozoal maturation (Dadoune, 2003). This was, indeed, what was found in an earlier study, where CMA3 staining was examined *in situ* in spermatozoa from the caput and cauda epididymides of mice (Sakkas *et al.*, 1995). The apparent discrepancy between our results and those of Sakkas *et al.* (1995) may be attributable to (i) the fact that mouse spermatozoa have two protamines, whereas rat spermatozoa have only one; and (ii) the use of flow cytometry for detecting changes in fluorescence, which is more sensitive than the *in situ* method, may have allowed the identification of changes that would not otherwise have been possible.

Our results suggest that other factors, such as chromatin condensation, may affect the results of this assay. This puts in question the conclusions that have been reached by those studying human infertility, who found that men with reduced fertility have increased CMA3 staining in their spermatozoa and interpreted this as a sign of decreased protamination (McMurray and Kortun, 2003; Nasr-Esfahani *et al.*, 2004); an alternative explanation may be that this reduced fertility is associated with less cross-linked or compact spermatozoa.

Passage through the epididymis also resulted in a dramatic change in spermatozoal denaturation parameters. Both DFI and DFI percentage were lower in the more mature spermatozoa, perhaps reflecting the more oxidized status of the thiols, which would impede strand dissociation. Interestingly, the DFI was only slightly lower in spermatozoa from the

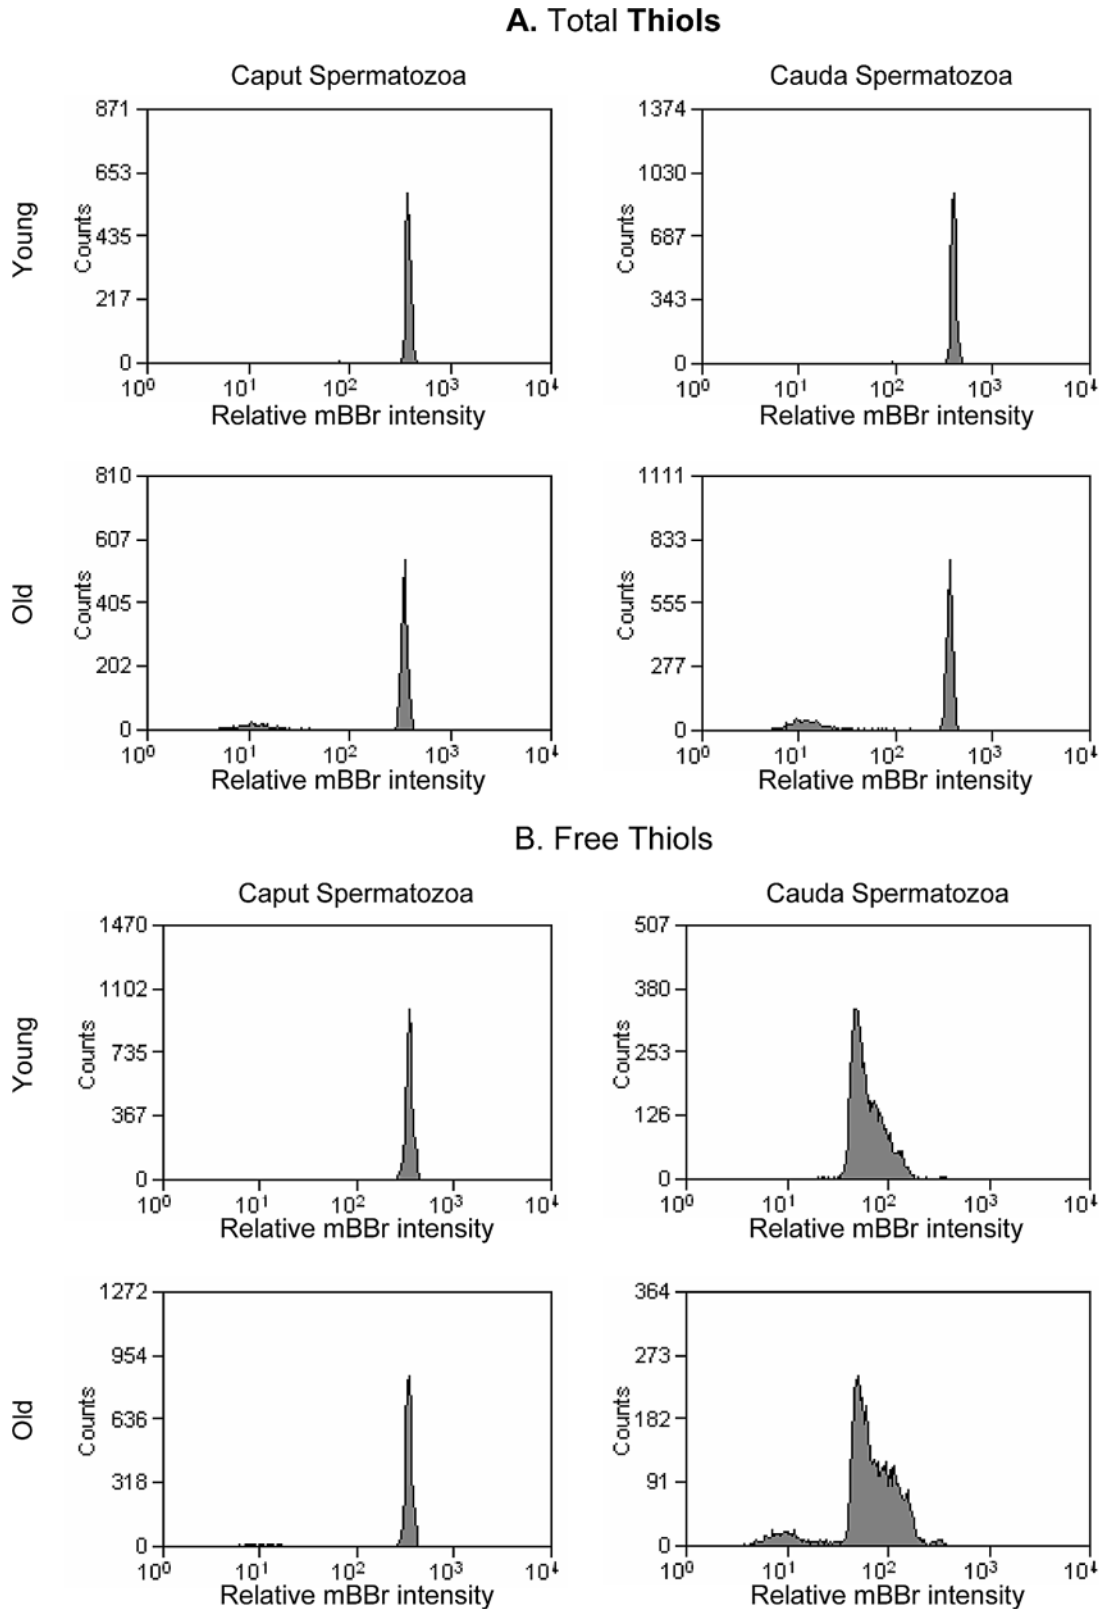

**Figure 2.** Flow cytometric histogram showing fluorescence intensity of monobromobimane (mBBR) staining of total thiols (A) and free thiols (B). The population of cells with low thiol levels is clearly visible to the left of the main spermatozoa population in old animals.

cauda epididymidis, whereas DFI percentage was dramatically reduced. This difference reflects the complementary nature of the two tests, where DFI percentage reflects the percentage of cells that have abnormal denaturation and DFI

indicates the extent of the shift. It appears that the majority of spermatozoa from the caput epididymidis will undergo chromatin dissociation, but the extent of this dissociation is slight.

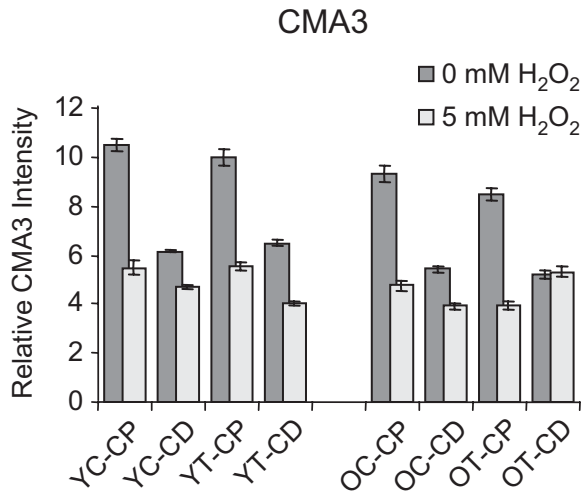

**Figure 3.** Association of CMA3 with spermatozoal nuclei. Data are mean  $\pm$  SEM,  $n = 8$ . Statistical analysis for this figure is provided in Table I. YC, young control rats; YT, young rats treated with BSO; OC, old control rats; OT, old rats treated with BSO; CP, spermatozoa extracted from the caput epididymidis; CD, spermatozoa extracted from the cauda epididymidis.

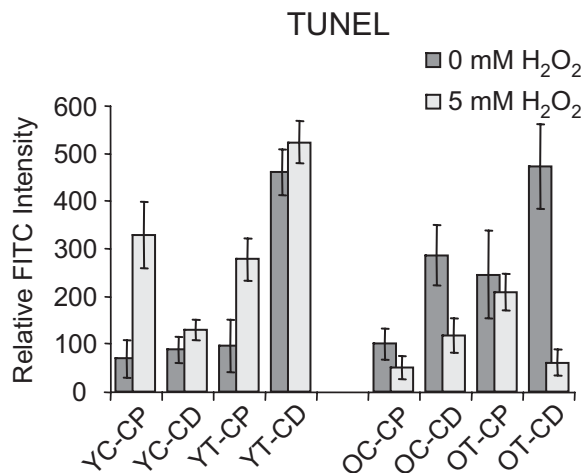

**Figure 4.** Measurement of DNA breaks containing 3'OH ends in spermatozoal nuclei by TUNEL staining. Data are mean  $\pm$  SEM,  $n = 8$ . Statistical analysis for this figure is provided in Table I. YC, young control rats; YT, young rats treated with BSO; OC, old control rats; OT, old rats treated with BSO; CP, spermatozoa extracted from the caput epididymidis; CD, spermatozoa extracted from the cauda epididymidis.

Other differences between spermatozoa from the caput and cauda epididymidis include increased TUNEL staining in spermatozoa taken from the cauda region. However, as this change is observed only in spermatozoa from old animals, it will be discussed in greater detail in the following section, which focuses on changes observed with age.

#### Changes in spermatozoa with age

Our second objective was to evaluate how chromatin packaging in spermatozoa changes with age. When looking at thiol

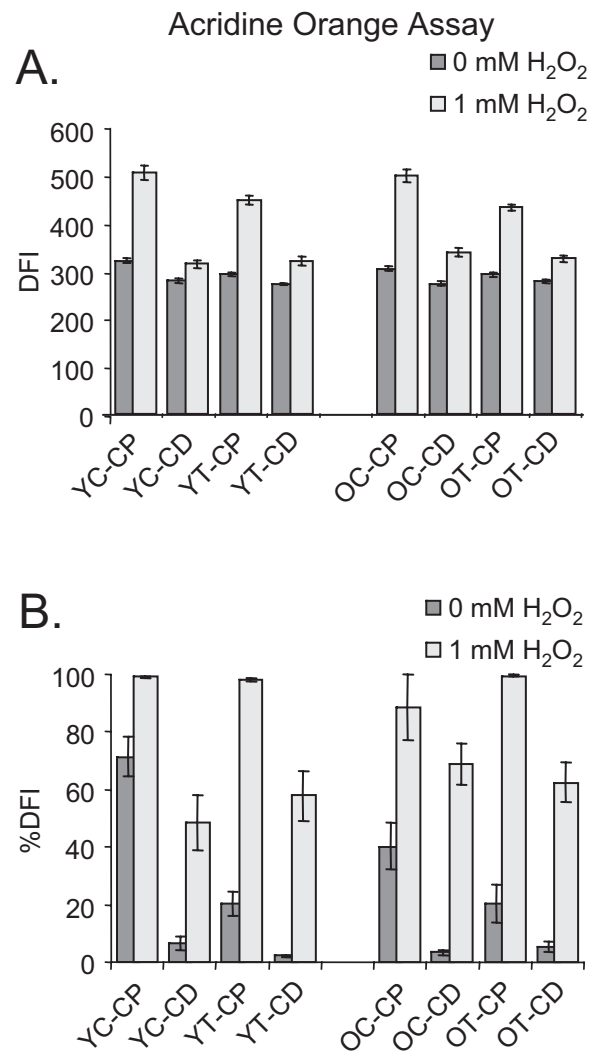

**Figure 5.** Measurement of DFI (A) and DFI percentage (B) in spermatozoal heads by the acridine orange (AO) assay. Data are mean  $\pm$  SEM,  $n = 8$ . Statistical analysis for these figures is provided in Table I. YC, young control rats; YT, young rats treated with BSO; OC, old control rats; OT, old rats treated with BSO; CP, spermatozoa extracted from the caput epididymidis; CD, spermatozoa extracted from the cauda epididymidis.

groups in spermatozoa heads, we discovered the presence of a distinct spermatozoa population in older rats, which was not detected with the other assays. This might be because the sensitivity of the other assays was not as great, as the population constituted approximately 10% of the cells, or because the observed effect was specific to thiols and did not influence other parameters. However, all of the assays are based on flow cytometry, and their sensitivity would be expected to be similar. Therefore, the mBBR assay appears to measure a parameter that is not detected by the other tests, suggesting that it would be useful to further define the relationship between thiols in the spermatozoal heads and successful pregnancy outcomes by adding this simple but powerful assay with other tests routinely used in infertility clinics. It has a strong potential for becoming useful in the assessment of spermatozoa quality as mBBR does not bind to the chromatin directly and spermatozoa remain

motile and maintain their ability to capacitate and acrosome-react even after being stained with this dye (Cummins *et al.*, 1986).

Other than the change in thiols, we also observed an age-dependent change in DFI percentage, where the DFI percentage was almost twice as high in spermatozoa from the caput and cauda epididymidis from young animals as in those from old. The DFI, on the contrary, was only slightly higher in the young. Combined, these results indicate that in young animals more of the spermatozoa were susceptible to chromatin dissociation, but the extent of this dissociation was not great. At this point, it is difficult to determine why the susceptibility of spermatozoal chromatin to dissociation is decreasing with age, but it is clear that some aspect of chromatin packaging is affected.

Another parameter that points to a change in chromatin packaging with age is the decreased CMA3 staining observed in epididymal spermatozoa from old rats. This finding once again raises the question as to whether this assay truly measures a change in protamine levels or whether decreased staining implies that the DNA is less accessible to the fluorochrome. It appears unlikely that the decrease in CMA3 staining would be explained by increased protamination, as total thiol levels were consistently lower in spermatozoa from older rats. Therefore, the results of this assay suggest that chromatin packaging in epididymal spermatozoa becomes altered with age.

We can only speculate as to what might be changing in chromatin packaging and what could be the reason for having a spermatozoal population with low thiols. The change in thiols might be because of problems with the protamines, as they are the main source of thiols in the spermatozoa head. Studies in humans have demonstrated that some types of male infertility have increased histone-to-protamine ratios (Silvestroni *et al.*, 1976; Zhang *et al.*, 2006), as well as abnormal protamine deposition (Balhorn *et al.*, 1988; Carrell and Liu, 2001; Aoki *et al.*, 2005) and decreased protamine RNA (Steger *et al.*, 2001; Morrison *et al.*, 2005). It is possible that the changes we observed in spermatozoa of ageing rats have the same origin as the problems described in these studies. However, there are several other possibilities, such as abnormal protamine dephosphorylation or sloughing of immature spermatozoa from the seminiferous tubes that could be causing the observed phenotype.

In this study, we used the TUNEL assay coupled to flow cytometry to assess spermatozoa DNA quality. Traditionally, the TUNEL assay is referred to as an apoptosis assay, but this definition is limiting, as the TdT enzyme will label 3'OH DNA termini with FITC-dUTP in any cell that contains this type of DNA breaks, not only in those undergoing apoptosis. Some authors have stated that mature spermatozoa staining positive for TUNEL are in the process of undergoing apoptosis (Oosterhuis *et al.*, 2000; Anzar *et al.*, 2002; Oosterhuis and Vermes, 2004), but in fact mature spermatozoal DNA is not accessible for transcription, and spermatozoa do not have the ability to synthesize proteins *de novo* (Diez-Sanchez *et al.*, 2003), making upregulation of apoptotic mediators and apoptosis itself a virtual impossibility. Therefore, when applied to spermatozoa, this assay measures DNA integrity and not cellular apoptosis. Over the last few years, it has gained popularity as a tool for

assessing chromatin quality in spermatozoa from humans (Sun *et al.*, 1997; Vicari *et al.*, 2002; Muratori *et al.*, 2003; Erenpreiss *et al.*, 2004; Said *et al.*, 2005).

In this report, we are the first to adapt the TUNEL assay for evaluating rodent spermatozoa or to use it on caput spermatozoa from any source. Our results for the young and old control animals show that there is more 3'OH DNA staining in spermatozoa from cauda epididymides in older rats. This suggests a decrease in DNA quality with age and further implicates the epididymis as the site where antioxidant protection becomes compromised. These results support the findings of our earlier study, where we found a significant age effect on the antioxidant enzymes in the cauda epididymidis (Zubkova and Robaire, 2004).

The increase in TUNEL, as well as the presence of a low thiol staining spermatozoal population in spermatozoa from older animals, suggests the possibility of an increase in immature spermatozoa becoming released from the seminiferous epithelium of the testes with age. An even more serious concern in older animals is that, because of the apparent increase in oxidative challenge and/or decrease in antioxidants in the epididymis, spermatozoal chromatin may be accumulating the 8-OH-2'-deoxyguanosine (8-OHdG) adduct, which, upon replication, has been shown to become mutagenic (Kamiya, 2003).

#### *Changes in spermatozoa after BSO and H<sub>2</sub>O<sub>2</sub>*

From the end-points measured in this study, the most evident response to BSO was the dramatic oxidizing shift in caput epididymal spermatozoa from a predominantly free thiol state to disulphides, probably attributable to the systemic oxidative challenge induced by BSO. This increase in disulphides might also be the reason behind the decrease in CMA3 penetration and the decreased DFI and DFI percentage, particularly because changes in these parameters were observed only in spermatozoa from the caput, but not the cauda epididymidis, where disulphide levels are already high. The changes in TUNEL staining, however, were probably not dependent on thiol oxidation but were due to direct effects of increased oxidants on DNA. It would then appear reasonable that spermatozoa are more susceptible to DNA damage during their transport through the epididymis than during the final steps of spermiogenesis, as there is no evidence for DNA repair in epididymal spermatozoa (Parvinen and Hecht, 1981; Van Loon *et al.*, 1991; McMurray and Kortun, 2003). Overall, the response of spermatozoa from young and old rats to BSO treatment was very similar in all assays. Therefore, it appears that the reaction to glutathione depletion is not greatly altered by age but rather is dependent on the stage of maturation of spermatozoa.

The incubation of spermatozoa in H<sub>2</sub>O<sub>2</sub>, on the contrary, generated striking responses. Some parameters, such as the thiol measurements and AO assay results, changed in a manner that is consistent with the oxidizing and DNA-damaging properties of H<sub>2</sub>O<sub>2</sub> (Halliwell and Gutteridge, 2002; Bennetts and Aitken, 2005; Zubkova *et al.*, 2005). Other parameters, specifically the TUNEL and CMA3 assays, showed an unexpected effect of H<sub>2</sub>O<sub>2</sub> on BSO-treated spermatozoa taken from the cauda epididymides of old rats. In this group, TUNEL staining



dropped to very low levels, which is inconsistent with results we obtained for the other spermatozoa groups, with previous reports on the effect of oxidants on spermatozoa (Said *et al.*, 2005; Smith *et al.*, 2005) or with what is known about the DNA-damaging effect of H<sub>2</sub>O<sub>2</sub> in general (Halliwell and Gutteridge, 2002). This unusual response might be because of the oxidative damage reaching a critical level, at which point the 3'OH DNA groups become altered and can no longer bind the fluorochrome.

The increase in CMA3 staining in H<sub>2</sub>O<sub>2</sub>- and BSO-treated spermatozoa from the cauda epididymides of old rats was also an uncharacteristic response, as in this and previous studies, we observed that thiol oxidation corresponded to decreased CMA3 penetrability (Zubkova *et al.*, 2005). No other research groups have looked at the effect of oxidants on CMA3 staining, making it difficult to explain the observed response. It is possible, however, that similar to the TUNEL assay, altered CMA3 staining may be because of oxidative damage reaching a critical point, no longer condensing the chromatin, but creating a more fragmented structure more prone to absorbing fluorochrome.

## Conclusion

In summary, we have used clinically relevant assays to examine spermatozoal chromatin packaging and integrity. The results of these assays show that the chromatin was altered during spermatozoal passage along the epididymis, where it became more compact and nuclear thiols were oxidized. Furthermore, we found that the measured parameters differed between young and old animals, demonstrating a shift towards greater chromatin compactness and decreased quality with age. Finally, although spermatozoa from young and old animals responded similarly to *in vivo* oxidative challenge, it is clear that spermatozoa from the cauda epididymidis of old rats have a different susceptibility to the combined effects of *in vivo* and *in vitro* oxidative challenges than did the spermatozoa from young animals.

The results of this study may have implications for older men who wish to father children. If their spermatozoa are more sensitive to the effects of oxidants, dietary antioxidant supplementation might be of benefit, because this has been found to improve spermatozoal quality in several trials (Lenzi *et al.*, 1993; Vezina *et al.*, 1996; Zabludovsky *et al.*, 1999; Keskes-Ammar *et al.*, 2003). In addition to this, the finding of a distinct population in spermatozoa from older males is particularly relevant to patients undergoing IVF and especially intra-cytoplasmic sperm injection—a technique in which the natural spermatozoa selection processes are entirely bypassed. Further examination of the changes that occur in spermatozoal quality with age may unveil a common origin with some of the problems seen in male infertility.

## Acknowledgements

We thank Eric Massicotte, Martine Dupuis, Ken MacDonald and Geraldine Delbès for their excellent assistance with the flow cytometry. These studies were funded by a grant from the Canadian Institutes for Health Research.

## References

- Aitken RJ and Krausz C (2001) Oxidative stress, DNA damage and the Y chromosome. *Reproduction* 122,497–506.
- Alberg A (2002) The influence of cigarette smoking on circulating concentrations of antioxidant micronutrients. *Toxicology* 180,121–137.
- Alvarez JG and Storey BT (1992) Evidence for increased lipid peroxidative damage and loss of superoxide dismutase activity as a mode of sublethal cryodamage to human sperm during cryopreservation. *J Androl* 13,232–241.
- Anzar M, He L, Buhr MM, Kroetsch TG and Pauls KP (2002) Sperm apoptosis in fresh and cryopreserved bull semen detected by flow cytometry and its relationship with fertility. *Biol Reprod* 66,354–360.
- Aoki VW, Moskovtsev SI, Willis J, Liu L, Mullen JB and Carrell DT (2005) DNA integrity is compromised in protamine-deficient human sperm. *J Androl* 26,741–748.
- Bagchi D, Bagchi M, Hassoun E, Moser J and Stohs SJ (1993) Effects of carbon tetrachloride, menadione, and paraquat on the urinary excretion of malondialdehyde, formaldehyde, acetaldehyde, and acetone in rats. *J Biochem Toxicol* 8,101–106.
- Baird DT, Collins J, Egozcue J, Evers LH, Gianaroli L, Leridon H, Sunde A, Templeton A, Van Steirteghem A, Cohen J *et al.* (2005) Fertility and ageing. *Hum Reprod Update* 11,261–276.
- Balaban RS, Nemoto S and Finkel T (2005) Mitochondria, oxidants, and aging. *Cell* 120,483–495.
- Balhorn R (1982) A model for the structure of chromatin in mammalian sperm. *J Cell Biol* 93,298–305.
- Balhorn R, Reed S and Tanphaichit N (1988) Aberrant protamine 1/protamine 2 ratios in sperm of infertile human males. *Experientia* 44,52–55.
- Bennets LE and Aitken RJ (2005) A comparative study of oxidative DNA damage in mammalian spermatozoa. *Mol Reprod Dev* 71,77–87.
- Bianchi PG, Manicardi GC, Bizzaro D, Bianchi U and Sakkas D (1993) Effect of deoxyribonucleic acid protamination on fluorochrome staining and *in situ* nick-translation of murine and human mature spermatozoa. *Biol Reprod* 49,1083–1088.
- Bizzaro D, Manicardi GC, Bianchi PG, Bianchi U, Mariethoz E and Sakkas D (1998) *In-situ* competition between protamine and fluorochromes for sperm DNA. *Mol Hum Reprod* 4,127–132.
- Bokov A, Chaudhuri A and Richardson A (2004) The role of oxidative damage and stress in aging. *Mech Ageing Dev* 125,811–826.
- Bruno RS and Traber MG (2005) Cigarette smoke alters human vitamin E requirements. *J Nutr* 135,671–674.
- Calvin HI and Bedford JM (1971) Formation of disulphide bonds in the nucleus and accessory structures of mammalian spermatozoa during maturation in the epididymis. *J Reprod Fertil (Suppl)* 13,65–75.
- Carrell DT and Liu L (2001) Altered protamine 2 expression is uncommon in donors of known fertility, but common among men with poor fertilizing capacity, and may reflect other abnormalities of spermiogenesis. *J Androl* 22,604–610.
- Clermont Y (1972) Kinetics of spermatogenesis in mammals: seminiferous epithelium cycle and spermatogonial renewal. *Physiol Rev* 52,198–236.
- Comhaire FH, Mahmoud AM, Depuydt CE, Zalata AA and Christophe AB (1999) Mechanisms and effects of male genital tract infection on sperm quality and fertilizing potential: the andrologist's viewpoint. *Hum Reprod Update* 5,393–398.
- Conrad M, Moreno SG, Sinowatz F, Ursini F, Kolle S, Roveri A, Brielmeier M, Wurst W, Maiorino M and Bornkamm GW (2005) The nuclear form of phospholipid hydroperoxide glutathione peroxidase is a protein thiol peroxidase contributing to sperm chromatin stability. *Mol Cell Biol* 25,7637–7644.
- Crow JF (1999) Spontaneous mutation in man. *Mutat Res* 437,5–9.
- Cummins JM, Fleming AD, Crozet N, Kuehl TJ, Kosower NS and Yanagimachi R (1986) Labelling of living mammalian spermatozoa with the fluorescent thiol alkylating agent, monobromobimane (MB): immobilization upon exposure to ultraviolet light and analysis of acrosomal status. *J Exp Zool* 237,375–382.
- Dadoune JP (2003) Expression of mammalian spermatozoal nucleoproteins. *Microsc Res Tech* 61,56–75.
- de Jager C, Bornman MS, Aneck-Hahn NH, du Toit D and Viljoen E (1996) Effect of rotation on the generation of reactive oxygen species in human semen. *Andrologia* 28,291–293.
- de Lamirande E and Gagnon C (1995) Impact of reactive oxygen species on spermatozoa: a balancing act between beneficial and detrimental effects. *Hum Reprod* 10 (Suppl 1),15–21.
- Diez-Sanchez C, Ruiz-Pesini E, Montoya J, Perez-Martos A, Enriquez JA and Lopez-Perez MJ (2003) Mitochondria from ejaculated human spermatozoa do not synthesize proteins. *FEBS Lett* 553,205–208.

- Erenpreiss J, Jepson K, Giwercman A, Tsarev I, Erenpreisa J and Spano M (2004) Toluidine blue cytometry test for sperm DNA conformation: comparison with the flow cytometric sperm chromatin structure and TUNEL assays. *Hum Reprod* 19,2277–2282.
- Evenson DP, Higgins PJ, Grueneberg D and Ballachey BE (1985) Flow cytometric analysis of mouse spermatogenic function following exposure to ethylnitrosourea. *Cytometry* 6,238–253.
- Evenson DP, Baer RK and Jost LK (1989) Flow cytometric analysis of rodent epididymal spermatozoal chromatin condensation and loss of free sulfhydryl groups. *Mol Reprod Dev* 1,283–288.
- Evenson DP, Larson KL and Jost LK (2002) Sperm chromatin structure assay: its clinical use for detecting sperm DNA fragmentation in male infertility and comparisons with other techniques. *J Androl* 23,25–43.
- Griffith OW and Meister A (1979) Potent and specific inhibition of glutathione synthesis by buthionine sulfoximine (S-n-butyl homocysteine sulfoximine). *J Biol Chem* 254,7558–7560.
- Gurbay A, Gonthier B, Signorini-Allibe N, Barret L, Favier A and Hincal F (2005) Ciprofloxacin-induced DNA damage in primary culture of rat astrocytes and protection by Vitamin E. *Neurotoxicology* 27,6–10.
- Halliwell B and Gutteridge JM (2002) *Free Radicals in Biology and Medicine* 3rd edn. Oxford Science Publications, New York.
- Harman D (1972) The biologic clock: the mitochondria? *J Am Geriatr Soc* 20,145–147.
- Hazelton GA and Lang CA (1985) Glutathione peroxidase and reductase activities in the aging mouse. *Mech Ageing Dev* 29,71–81.
- Hughes CM, Lewis SE, McKelvey-Martin VJ and Thompson W (1998) The effects of antioxidant supplementation during Percoll preparation on human sperm DNA integrity. *Hum Reprod* 13,1240–1247.
- Hurst LD and Ellegren H (1998) Sex biases in the mutation rate. *Trends Genet* 14,446–452.
- Kamiya H (2003) Mutagenic potentials of damaged nucleic acids produced by reactive oxygen/nitrogen species: approaches using synthetic oligonucleotides and nucleotides: survey and summary. *Nucleic Acids Res* 31,517–531.
- Keskes-Ammar L, Feki-Chakroun N, Rebai T, Sahnoun Z, Ghozzi H, Hammami S, Zghal K, Fki H, Damak J and Bahloul A (2003) Sperm oxidative stress and the effect of an oral vitamin E and selenium supplement on semen quality in infertile men. *Arch Androl* 49,83–94.
- Kidd SA, Eskenazi B and Wyrobek AJ (2001) Effects of male age on semen quality and fertility: a review of the literature. *Fertil Steril* 75,237–248.
- Kuhnert B and Nieschlag E (2004) Reproductive functions of the ageing male. *Hum Reprod Update* 10,327–339.
- Lenzi A, Culasso F, Gandini L, Lombardo F and Dondero F (1993) Placebo-controlled, double-blind, cross-over trial of glutathione therapy in male infertility. *Hum Reprod* 8,1657–1662.
- Levy S, Serre V, Hermo L and Robaire B (1999) The effects of aging on the seminiferous epithelium and the blood–testis barrier of the Brown Norway rat. *J Androl* 20,356–365.
- Martensson J, Jain A, Stole E, Frayer W, Auld PA and Meister A (1991) Inhibition of glutathione synthesis in the newborn rat: a model for endogenously produced oxidative stress. *Proc Natl Acad Sci U S A* 88,9360–9364.
- McMurray CT and Kortun IV (2003) Repair in haploid male germ cells occurs late in differentiation as chromatin is condensing. *Chromosoma* 111,505–508.
- Morales E, Horn R, Pastor LM, Santamaria L, Pallares J, Zuasti A, Ferrer C and Canteras M (2004) Involution of seminiferous tubules in aged hamsters: an ultrastructural, immunohistochemical and quantitative morphological study. *Histol Histopathol* 19,445–455.
- Morrison JP, Coleman MC, Aunan ES, Walsh SA, Spitz DR and Kregel KC (2005) Aging reduces responsiveness to BSO- and heat stress-induced perturbations of glutathione and antioxidant enzymes. *Am J Physiol Regul Integr Comp Physiol* 289,R1035–R1041.
- Muratori M, Maggi M, Spinelli S, Filimberti E, Forti G and Baldi E (2003) Spontaneous DNA fragmentation in swim-up selected human spermatozoa during long term incubation. *J Androl* 24,253–262.
- Nasr-Esfahani MH, Salehi M, Razavi S, Mardani M, Bahramian H, Steger K and Oreizi F (2004) Effect of protamine-2 deficiency on ICSI outcome. *Reprod Biomed Online* 9,652–658.
- Ochsendorf FR (1999) Infections in the male genital tract and reactive oxygen species. *Hum Reprod Update* 5,399–420.
- Oosterhuis GJ and Vermees I (2004) Apoptosis in human ejaculated spermatozoa. *J Biol Regul Homeost Agents* 18,115–119.
- Oosterhuis GJ, Mulder AB, Kalsbeek-Batenburg E, Lambalk CB, Schoemaker J and Vermees I (2000) Measuring apoptosis in human spermatozoa: a biological assay for semen quality? *Fertil Steril* 74,245–250.
- Parvinen M and Hecht NB (1981) Identification of living spermatogenic cells of the mouse by transillumination-phase contrast microscopic technique for 'in situ' analyses of DNA polymerase activities. *Histochemistry* 71,567–579.
- Plas E, Berger P, Hermann M and Pfluger H (2000) Effects of aging on male fertility? *Exp Gerontol* 35,543–551.
- Rebrin I, Bayne AC, Mockett RJ, Orr WC and Sohal RS (2004) Free aminothiols, glutathione redox state and protein mixed disulphides in aging *Drosophila melanogaster*. *Biochem J* 382,131–136.
- Robaire B and Hermo L (1988) Efferent ducts, epididymis, and vas deferens: structure, functions, and their regulation. In E Knobil and J Neill (eds) *Physiology of Reproduction*. Raven Press, New York, pp. 999–1080.
- Roca J, Rodriguez MJ, Gil MA, Carvajal G, Garcia EM, Cuello C, Vazquez JM and Martinez EA (2005) Survival and in vitro fertility of boar spermatozoa frozen in the presence of superoxide dismutase and/or catalase. *J Androl* 26,15–24.
- Said TM, Agarwal A, Sharma RK, Thomas AJ Jr and Sikka SC (2005) Impact of sperm morphology on DNA damage caused by oxidative stress induced by beta-nicotinamide adenine dinucleotide phosphate. *Fertil Steril* 83,95–103.
- Sakkas D, Manicardi G, Bianchi PG, Bizzaro D and Bianchi U (1995) Relationship between the presence of endogenous nicks and sperm chromatin packaging in maturing and fertilizing mouse spermatozoa. *Biol Reprod* 52,1149–1155.
- Sartorelli EM, Mazzucatto LF and Pina-Neto JM (2001) Effect of paternal age on human sperm chromosomes. *Fertil Steril* 76,1119–1123.
- Shalgi R, Seligman J and Kosower NS (1989) Dynamics of the thiol status of rat spermatozoa during maturation: analysis with the fluorescent labeling agent monobromobimane. *Biol Reprod* 40,1037–1045.
- Sikka SC (2001) Relative impact of oxidative stress on male reproductive function. *Curr Med Chem* 8,851–862.
- Silvestroni L, Frajese G and Fabrizio M (1976) Histones instead of protamines in terminal germ cells of infertile, oligospermic men. *Fertil Steril* 27,1428–1437.
- Slott VL, Suarez JD and Perreault SD (1991) Rat sperm motility analysis: methodologic considerations. *Reprod Toxicol* 5,449–458.
- Smith R, Kaune H, Parodi D, Madariaga M, Rios R, Morales I and Castro A (2005) Increased sperm DNA damage in patients with varicocele: relationship with seminal oxidative stress. *Hum Reprod* 21,986–993.
- Steger K, Failing K, Klonisch T, Behre HM, Manning M, Weidner W, Hertle L, Bergmann M and Kliesch S (2001) Round spermatids from infertile men exhibit decreased protamine-1 and -2 mRNA. *Hum Reprod* 16,709–716.
- Sun JG, Jurisicova A and Casper RF (1997) Detection of deoxyribonucleic acid fragmentation in human sperm: correlation with fertilization in vitro. *Biol Reprod* 56,602–607.
- Tirmenstein MA and Nelson SD (1990) Acetaminophen-induced oxidation of protein thiols. Contribution of impaired thiol-metabolizing enzymes and the breakdown of adenine nucleotides. *J Biol Chem* 265,3059–3065.
- Van Loon AA, Den Boer PJ, Van der Schans GP, Mackenbach P, Grootegoed JA, Baan RA and Lohman PH (1991) Immunochemical detection of DNA damage induction and repair at different cellular stages of spermatogenesis of the hamster after in vitro or in vivo exposure to ionizing radiation. *Exp Cell Res* 193,303–309.
- Vezina D, Mauffette F, Roberts KD and Bleau G (1996) Selenium-vitamin E supplementation in infertile men. Effects on semen parameters and micronutrient levels and distribution. *Biol Trace Elem Res* 53,65–83.
- Vicari E, Perdichizzi A, De Palma A, Burrello N, D'Agata R and Calogero AE (2002) Globozoospermia is associated with chromatin structure abnormalities: case report. *Hum Reprod* 17,2128–2133.
- Wouters-Tyrou D, Martinage A, Chevaillier P and Sautiere P (1998) Nuclear basic proteins in spermiogenesis. *Biochimie* 80,117–128.
- Zabludovsky N, Eltes F, Geva E, Berkovitz E, Amit A, Barak Y, Har-Even D and Bartoov B (1999) Relationship between human sperm lipid peroxidation, comprehensive quality parameters and IVF outcome. *Andrologia* 31,91–98.
- Zhang X, San Gabriel M and Zini A (2006) Sperm nuclear histone to protamine ratio in fertile and infertile men: evidence of heterogeneous subpopulations of spermatozoa in the ejaculate. *J Androl* 27,414–20.
- Zubkova EV and Robaire B (2004) Effect of glutathione depletion on antioxidant enzymes in the epididymis, seminal vesicles, and liver and on spermatozoa motility in the aging brown Norway rat. *Biol Reprod* 71,1002–1008.
- Zubkova EV, Wade M and Robaire B (2005) Changes in spermatozoal chromatin packaging and susceptibility to oxidative challenge during aging. *Fertil Steril* 84 (Suppl 2),1191–1198.

Submitted on March 23, 2006; resubmitted on May 2, 2006; accepted on May 5, 2006
